# Supplementary material for: Outcome predictors in COVID-19: An analysis of emergent systemic inflammation indices in Mexican population
Source: PubMed Central journal article supplement (PMC9633849; doi:10.3389/fmed.2022.1000147), 2022-10-21
Supplement: Data_Sheet_1.pdf [file Data_Sheet_1.pdf]

## *Supplementary Material*

### TABLES

**Supplementary TABLE 1 | Association between comorbidities, demographic factors, and outcome in COVID-19 patients**

|                        | <b>PaO<sub>2</sub>/FiO<sub>2</sub> ≤ 100</b> | <b>IMV</b>                   | <b>Non-survival</b>          |
|------------------------|----------------------------------------------|------------------------------|------------------------------|
| <b>Characteristics</b> | OR (95% IC), <i>p</i> -value                 | OR (95% IC), <i>p</i> -value | OR (95% IC), <i>p</i> -value |
| Sex male               | 0.83 (0.60-1.15), 0.281                      | 1.6 (1.10-2.31), 0.013       | 1.26 (0.93-1.71), 0.120      |
| >65 years old          | 1.63 (1.09-2.41), 0.016                      | 1.22 (0.81-1.84), 0.331      | 2.77 (1.91-4.01), <0.001     |
| Tobacco smoking        | 1.34 (0.96-1.87), 0.082                      | 1.19 (0.79-1.78), 0.390      | 1.06 (0.78-1.45), 0.675      |
| T2D                    | 0.87 (0.61-1.24), 0.461                      | 0.81 (0.54-1.19), 0.269      | 1.11 (0.81-1.52), 0.490      |
| HAS                    | 0.85 (0.61-1.18), 0.334                      | 1.27 (0.87-1.87), 0.212      | 1.28 (0.95-1.71), 0.096      |
| PCRD                   | 2.01 (1.17-3.47), 0.011                      | 0.84 (0.43-1.63), 0.618      | 1.50 (0.89-2.55), 0.126      |
| Obesity                | 1.38 (1.0-1.89), 0.045                       | 1.37 (0.94-1.99), 0.090      | 0.57 (0.42-0.76), <0.001     |

*HAS*, hypertension arterial systemic; *IMV*, invasive mechanic ventilation; *PCRD*, previous chronic respiratory disease; *T2D*, type 2 diabetes.

Statistical analyses were performed by a multivariate logistic regression model adjusted by sex and age. Significance was set at a *p*-value <0.05.

**Supplementary TABLE 2 | Hematological parameters and systemic inflammation indices in COVID-19 patients according to PaO<sub>2</sub>/FiO<sub>2</sub> ratio category**

| Characteristics                                    | PaO <sub>2</sub> /FiO <sub>2</sub> ratio |                       |                       | <i>p</i> -value |
|----------------------------------------------------|------------------------------------------|-----------------------|-----------------------|-----------------|
|                                                    | >200                                     | 200-101               | ≤100                  |                 |
| WBC, 10 <sup>3</sup> /mm <sup>3</sup>              | 9.3 (5.1-17)                             | 10 (4.8-19.3)         | 10.45 (5.7-19.2)      | 0.004           |
| Neutrophil count, 10 <sup>3</sup> /mm <sup>3</sup> | 8 (3.2-15.8)                             | 8.6 (4-17.3)          | 9.1 (4.6-17)          | 0.003           |
| Lymphocyte count, 10 <sup>3</sup> /mm <sup>3</sup> | 0.7 (0.2-2.0)                            | 0.6 (0.2-1.9)         | 0.6 (0.2-1.9)         | 0.010           |
| Monocyte count, 10 <sup>3</sup> /mm <sup>3</sup>   | 0.5 (0.2-1.1)                            | 0.5 (0.2-1.2)         | 0.5 (0.2-1.3)         | 0.873           |
| Eosinophil, count 10 <sup>3</sup> /mm <sup>3</sup> | 0 (0-0.3)                                | 0 (0-0.4)             | 0 (0-0.4)             | 0.232           |
| Basophil count, 10 <sup>3</sup> /mm <sup>3</sup>   | 0 (0-0.1)                                | 0 (0-0.1)             | 0 (0-0.1)             | 0.103           |
| Erythrocytes, 10 <sup>6</sup> /mm <sup>3</sup>     | 4.6 (2.94-5.45)                          | 4.4 (3-5.5)           | 4.3 (2.8-5.5)         | 0.004           |
| Hemoglobin, gr/dL                                  | 13.8 (9.2-16.8)                          | 13.4 (9.1-16.8)       | 13 (8.6-17)           | 0.010           |
| Hematocrit, %                                      | 40 (28.3-48.5)                           | 39.4 (26.6-49.2)      | 38.3 (25.8-49.1)      | 0.031           |
| Platelet count, 10 <sup>3</sup> /mm <sup>3</sup>   | 274 (134-512)                            | 271 (114-467)         | 248.5 (123-487)       | 0.112           |
| MPV, fL                                            | 8.5 (7.2-10.6)                           | 8.6 (7.1-10.5)        | 8.6 (7.2-10.2)        | 0.343           |
| RDW,                                               | 13.9 (12.7-16.0)                         | 14.1 (12.9-18.0)      | 14.3 (12.9-18.0)      | 0.001           |
| PLR                                                | 348.3 (121.9-1036)                       | 398.6 (134.5-1260)    | 398.4 (120.8-1325)    | 0.061           |
| NLR                                                | 10.3 (2.6-39.7)                          | 13.4 (3.6-52.6)       | 15.2 (3.2-52.0)       | <0.001          |
| dNLR                                               | 5.78 (1.55-15.5)                         | 6.94 (2.0-20.3)       | 7.85 (1.82-19.2)      | 0.003           |
| MLR                                                | 0.66 (0.2-2.0)                           | 0.76 (0.2-2.5)        | 0.81 (0.21-3.0)       | 0.025           |
| ELR                                                | 0 (0-0.3)                                | 0 (0-0.36)            | 0 (0-0.5)             | 0.483           |
| BLR                                                | 0 (0-0.11)                               | 0 (0-0.1)             | 0 (0-0.16)            | 0.126           |
| SII                                                | 2857.1 (556.5-10670.6)                   | 3528 (884.4-13530)    | 3685 (693.5-14869.3)  | 0.005           |
| SIRI                                               | 5.44 (0.96-19.87)                        | 6.48 (1.34-34.2)      | 7.6 (1.22-36.7)       | 0.003           |
| AISI                                               | 1254.2 (247.7-5950)                      | 1732.9 (302.9-9500.1) | 1956.8 (294.6-9911.2) | 0.023           |
| NHL                                                | 0.75 (0.18-3.09)                         | 1.0 (2.8-3.94)        | 1.21 (0.26-4.12)      | <0.001          |

*AISI*, aggregate index of systemic inflammation; *BLR*, basophil-to-lymphocyte ratio; *dNLR*, derived NLR; *ELR*, eosinophil-lymphocyte ratio; *MLR*, Monocyte to lymphocyte ratio; *MPV*, mean platelet volume; *NHL*, neutrophil-to-hemoglobin and lymphocyte; *NLR*, neutrophil to lymphocyte ratio; *PLR*, platelet to lymphocyte ratio; *RDW*, red blood cell distribution width; *SII*, systemic immune-inflammation index; *SIRI*, systemic inflammation response index. *WBC*, white blood cell count.

Statistical analyses were performed by Kruskal Wallis test comparing median (P<sub>5</sub>-P<sub>95</sub>).

*p*-value <0.05 was considered statistically significant.

**Supplementary TABLE 3 | Hematological parameters and systemic inflammation indices according to IMV support and outcome in COVID-19**

| Characteristics<br>Parameters                      | IMV                   |                       |                 | Outcome                    |                                |                 |
|----------------------------------------------------|-----------------------|-----------------------|-----------------|----------------------------|--------------------------------|-----------------|
|                                                    | No ( <i>n</i> = 196)  | Yes ( <i>n</i> = 352) | <i>p</i> -value | Survival ( <i>n</i> = 491) | Non-survival ( <i>n</i> = 316) | <i>p</i> -value |
| WBC, 10 <sup>3</sup> /mm <sup>3</sup>              | 8.25 (3.9-16.5)       | 10.4 (5.3-19.6)       | <0.001          | 9.5 (4.8-17.6)             | 10.8 (5.4-20.2)                | <0.001          |
| Neutrophil count, 10 <sup>3</sup> /mm <sup>3</sup> | 6.5 (2.7-13.8)        | 9.1 (4.3-17.3)        | <0.001          | 8 (3.8-16.2)               | 9.7 (4.5-18.3)                 | <0.001          |
| Lymphocyte count, 10 <sup>3</sup> /mm <sup>3</sup> | 0.7 (0.3-2.2)         | 0.6 (0.2-1.9)         | 0.002           | 0.7 (0.3-2.0)              | 0.6 (0.2-1.6)                  | <0.001          |
| Monocyte count, 10 <sup>3</sup> /mm <sup>3</sup>   | 0.5 (0.2-1.1)         | 0.5 (0.2-1.2)         | 0.042           | 0.5 (0.2-1.2)              | 0.5 (0.1-1.1)                  | 0.156           |
| Eosinophil, count 10 <sup>3</sup> /mm <sup>3</sup> | 0 (0-0.3)             | 0 (0-0.4)             | 0.004           | 0 (0-0.4)                  | 0 (0-0.4)                      | 0.835           |
| Basophil count, 10 <sup>3</sup> /mm <sup>3</sup>   | 0 (0-0.1)             | 0 (0-0.1)             | 0.420           | 0 (0-0.1)                  | 0 (0-0.1)                      | 0.602           |
| Erythrocytes, 10 <sup>6</sup> /mm <sup>3</sup>     | 4.8 (3.8-5.6)         | 4.3 (2.9-5.4)         | <0.001          | 4.5 (3.0-5.5)              | 4.2 (2.7-5.4)                  | <0.001          |
| Hemoglobin, gr/dL                                  | 14.5 (11.4-17)        | 13.1 (8.8-16.8)       | <0.001          | 13.5 (9.3-16.8)            | 13.1 (8.3-16.9)                | 0.010           |
| Hematocrit, %                                      | 42.3 (33.9-48.8)      | 38.6 (25.8-49.1)      | <0.001          | 39.7 (27.9-48.9)           | 38.5 (25.2-49.3)               | 0.039           |
| Platelet count, 10 <sup>3</sup> /mm <sup>3</sup>   | 278 (145-485)         | 266 (115-485)         | 0.203           | 279 (145-500)              | 241.5 (95.5-456.5)             | <0.001          |
| MPV, fL                                            | 8.5 (7.1-10.3)        | 8.6 (7.2-10.4)        | 0.321           | 8.5 (7.1-10.2)             | 8.7 (7.2-10.6)                 | 0.008           |
| RDW                                                | 13.8 (12.7-16.7)      | 14.2 (13-18.2)        | <0.001          | 14 (12.9-17.4)             | 14.4 (13-17.9)                 | 0.001           |
| PLR                                                | 386.6 (129.1-1036)    | 390 (126.4-1300)      | 0.094           | 379.5 (126.4-1196.6)       | 419 (130.0-1433.3)             | 0.112           |
| NLR                                                | 8.3 (2.2-28.3)        | 14 (3.7-52.6)         | <0.001          | 11 (2.9-42.5)              | 16.5 (4.5-62.0)                | <0.001          |
| dNLR                                               | 5.2 (1.5-14.0)        | 7.3 (2.1-20.2)        | <0.001          | 6.0 (1.78-15.7)            | 8.3 (2.8-23.0)                 | <0.001          |
| MLR                                                | 0.58 (0.20-1.75)      | 0.78 (0.22-2.7)       | <0.001          | 0.66 (0.22-2.0)            | 0.83 (0.20-3.2)                | 0.001           |
| ELR                                                | 0 (0-0.2)             | 0 (0-0.4)             | 0.004           | 0 (0-0.35)                 | 0 (0-0.48)                     | 0.476           |
| BLR                                                | 0 (0-0.1)             | 0 (0-0.12)            | 0.422           | 0 (0-0.1)                  | 0 (0-0.2)                      | 0.425           |
| SII                                                | 2317.7 (556.5-9873.5) | 3608.9 (871-13816)    | <0.001          | 3160.2 (688.5-12515.6)     | 4028.6 (897.8-15261)           | <0.001          |
| SIRI                                               | 3.89 (0.98-16.8)      | 7.0 (1.39-34.7)       | <0.001          | 5.8 (1.1-26.3)             | 7.7 (1.5-41.9)                 | <0.001          |
| AISI                                               | 1043.7 (230.6-4596.8) | 1826.3 (306.9-9871.7) | <0.001          | 1527.2 (260.9-8312.5)      | 1839.2 (334.3-11295.1)         | 0.048           |
| NHL                                                | 0.59 (0.14-2.16)      | 1.1 (0.29-4.1)        | <0.001          | 0.83 (0.20-3.2)            | 1.3 (0.39-4.5)                 | <0.001          |

*AISI*, aggregate index of systemic inflammation; *BLR*, basophil-to-lymphocyte ratio; *dNLR*, derived NLR; *ELR*, eosinophil-lymphocyte ratio; *MLR*, Monocyte to lymphocyte ratio ; *MPV*, mean platelet volume; *NHL*; *NHL*, neutrophil-to-hemoglobin and lymphocyte; *NLR*, neutrophil to lymphocyte ratio; *PLR*, platelet to

---

lymphocyte ratio; *RDW*, red blood cell distribution width; *SII*, systemic immune-inflammation index; *SIRI*, systemic inflammation response index; *WBC*, white blood cell count.

Statistical analyses were performed by Mann Whitney U test comparing median (P<sub>5</sub>-P<sub>95</sub>).

*p*-value <0.05 was considered statistically significant.

---

FIGURE

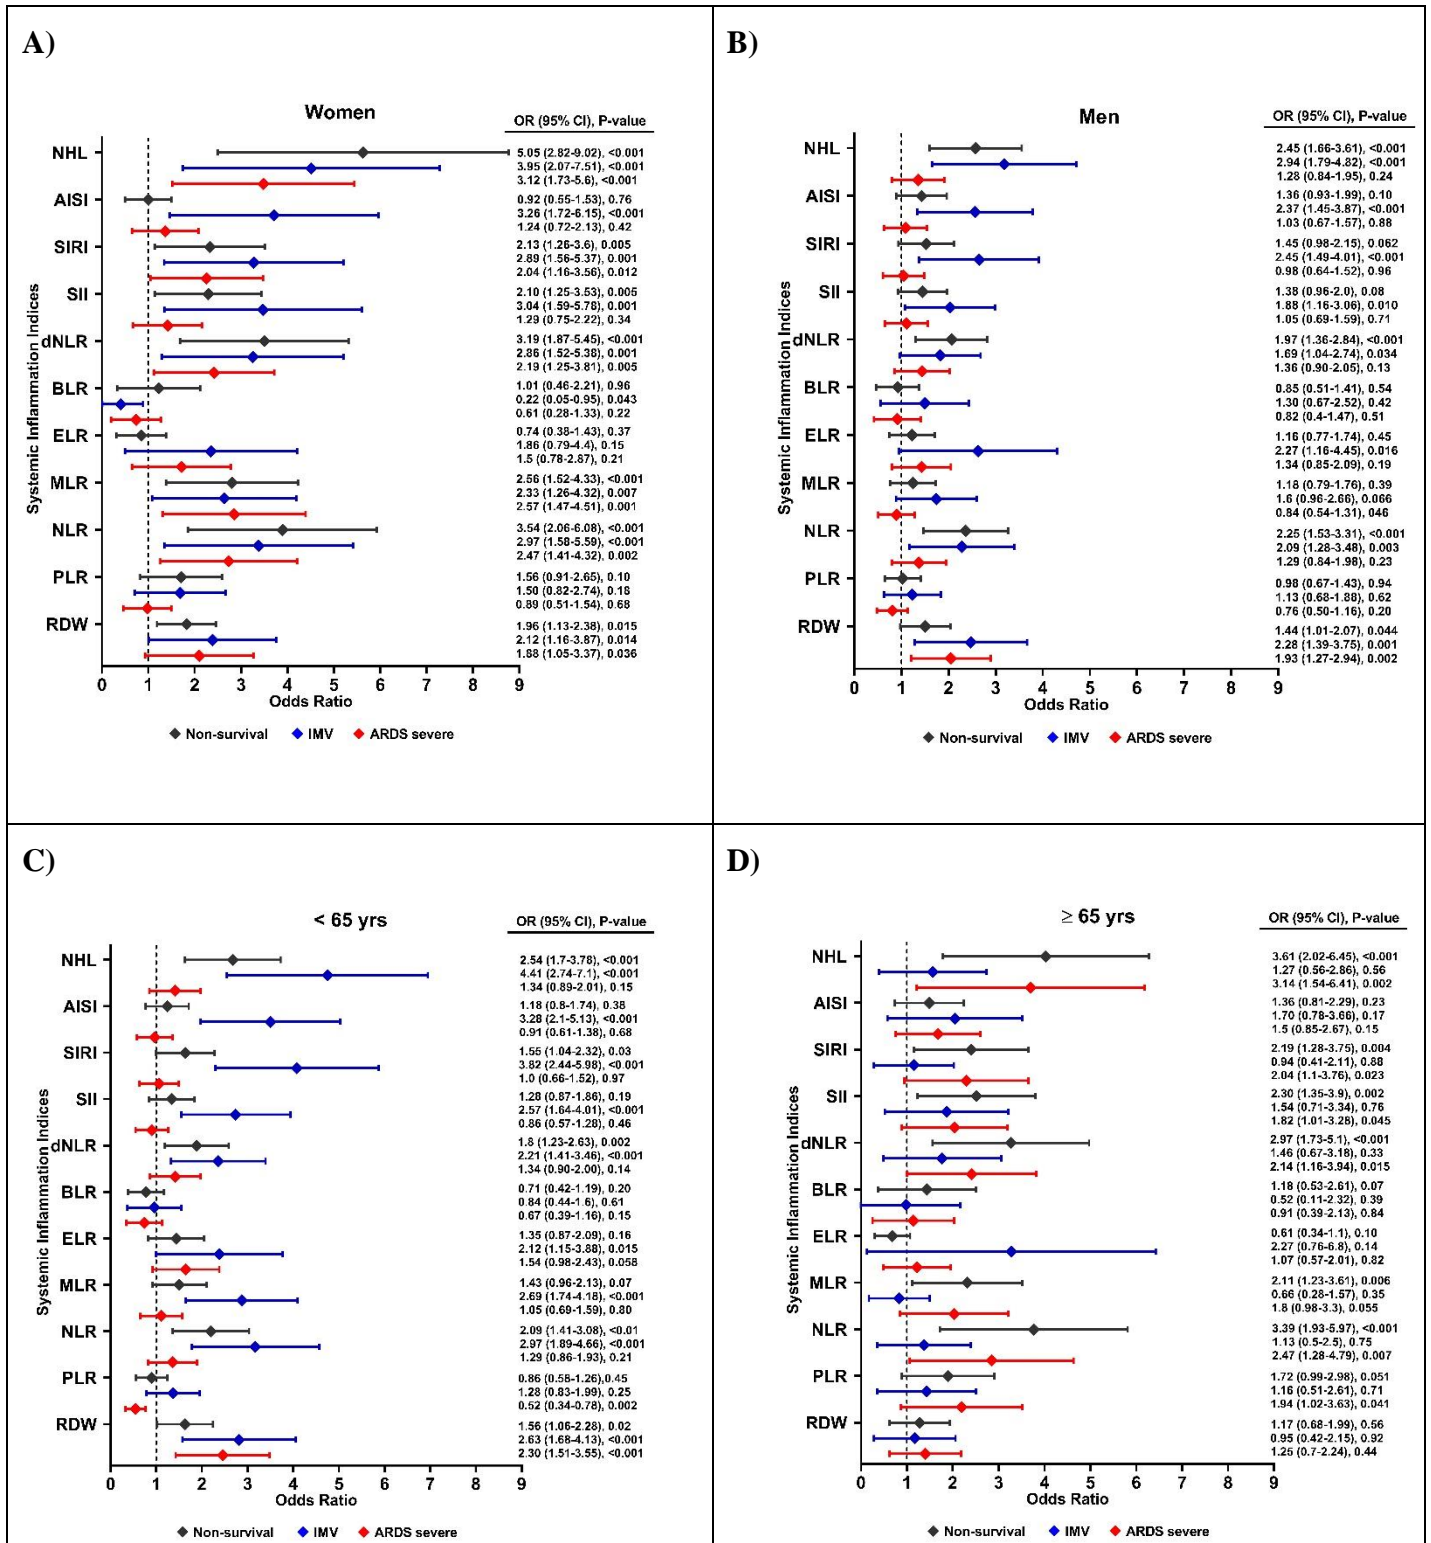

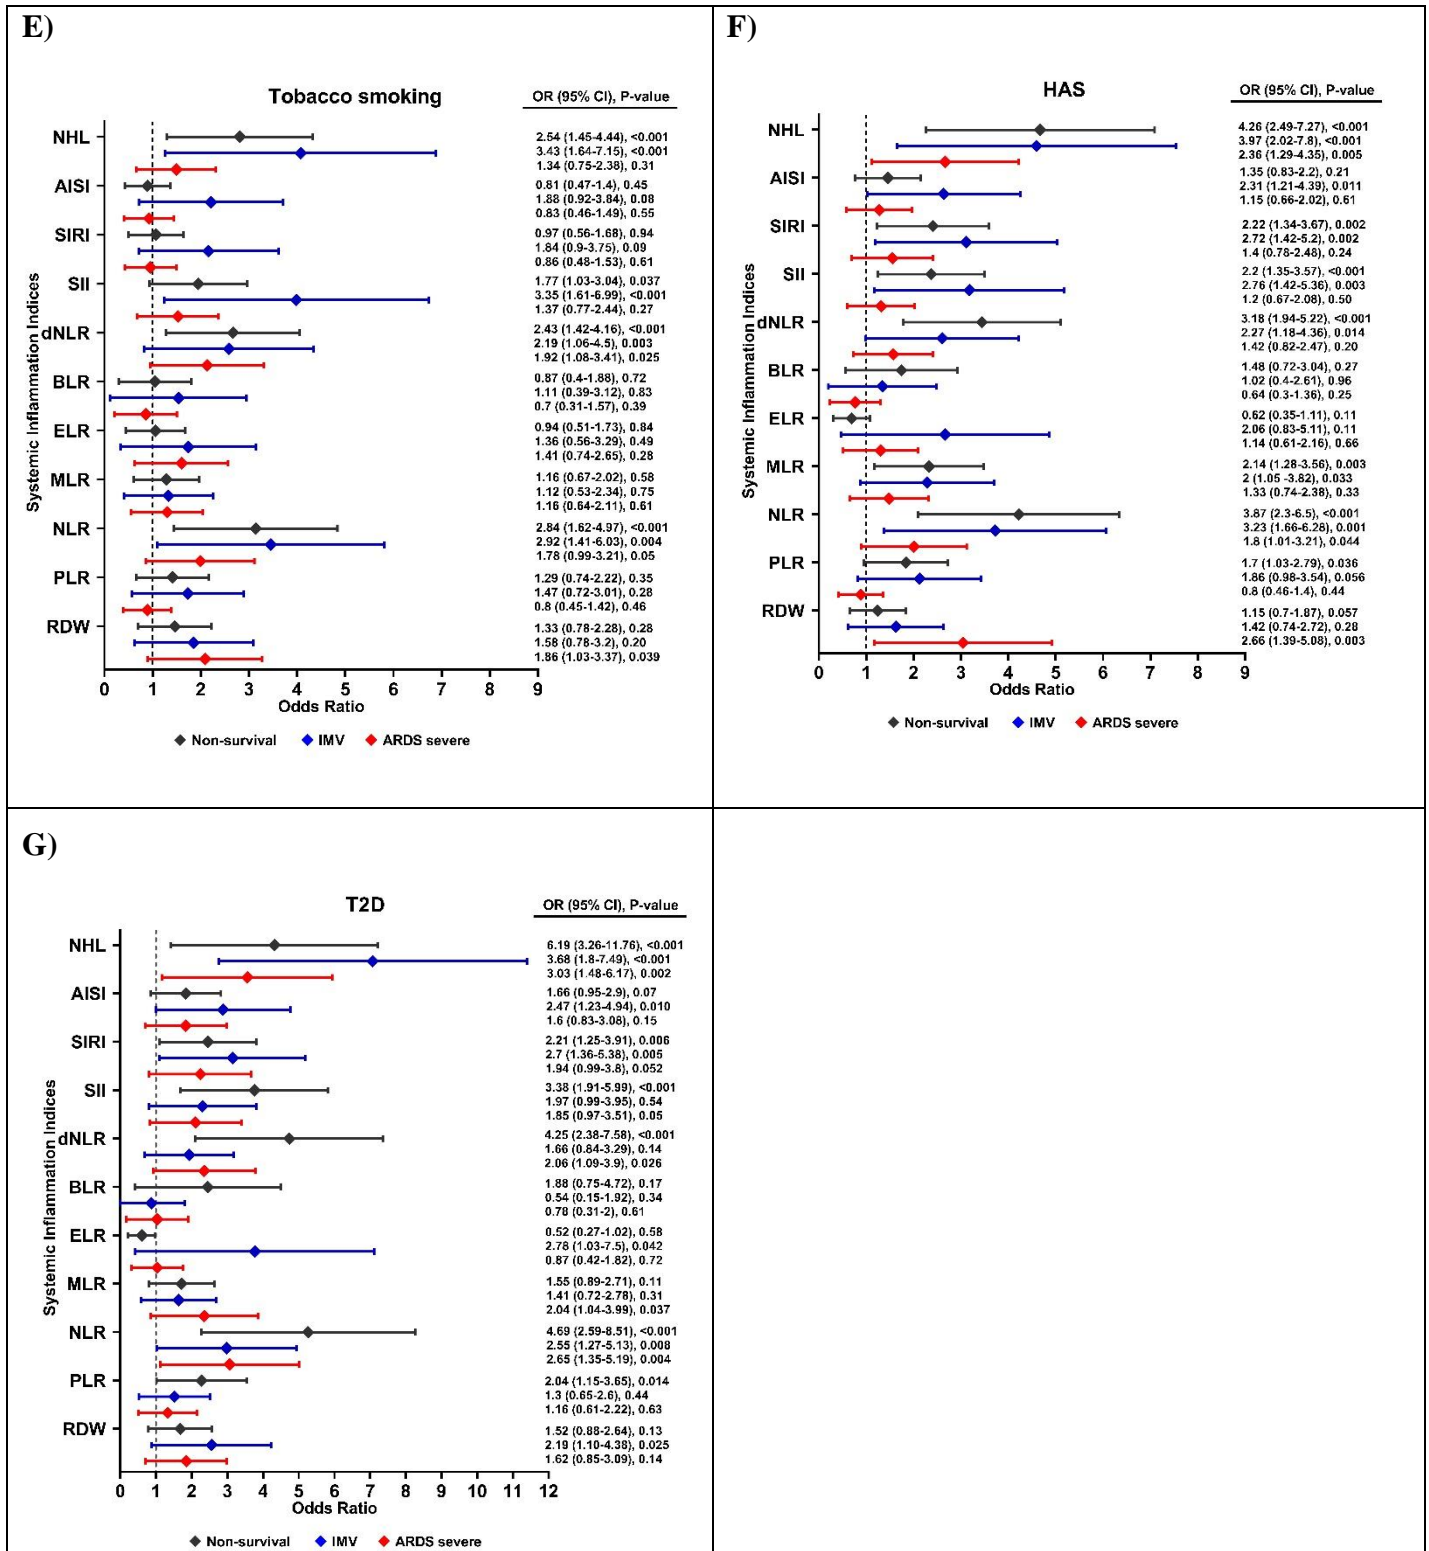

**Supplementary Figure 1 | Association between systemic inflammation indices and severe COVID-19, IMV support, and non-survival by COVID-19 according to sex, age, and comorbidities presence in Mexican patients. (A) Women, (B) Men, (C) ≤65 yrs, (D) ≥65 yrs, (E) Tobacco smoking, (F) HAS, and (G) T2D. A logistic regression crude analysis. Significance was set at  $p$ -value <0.05**

**FIGURE**
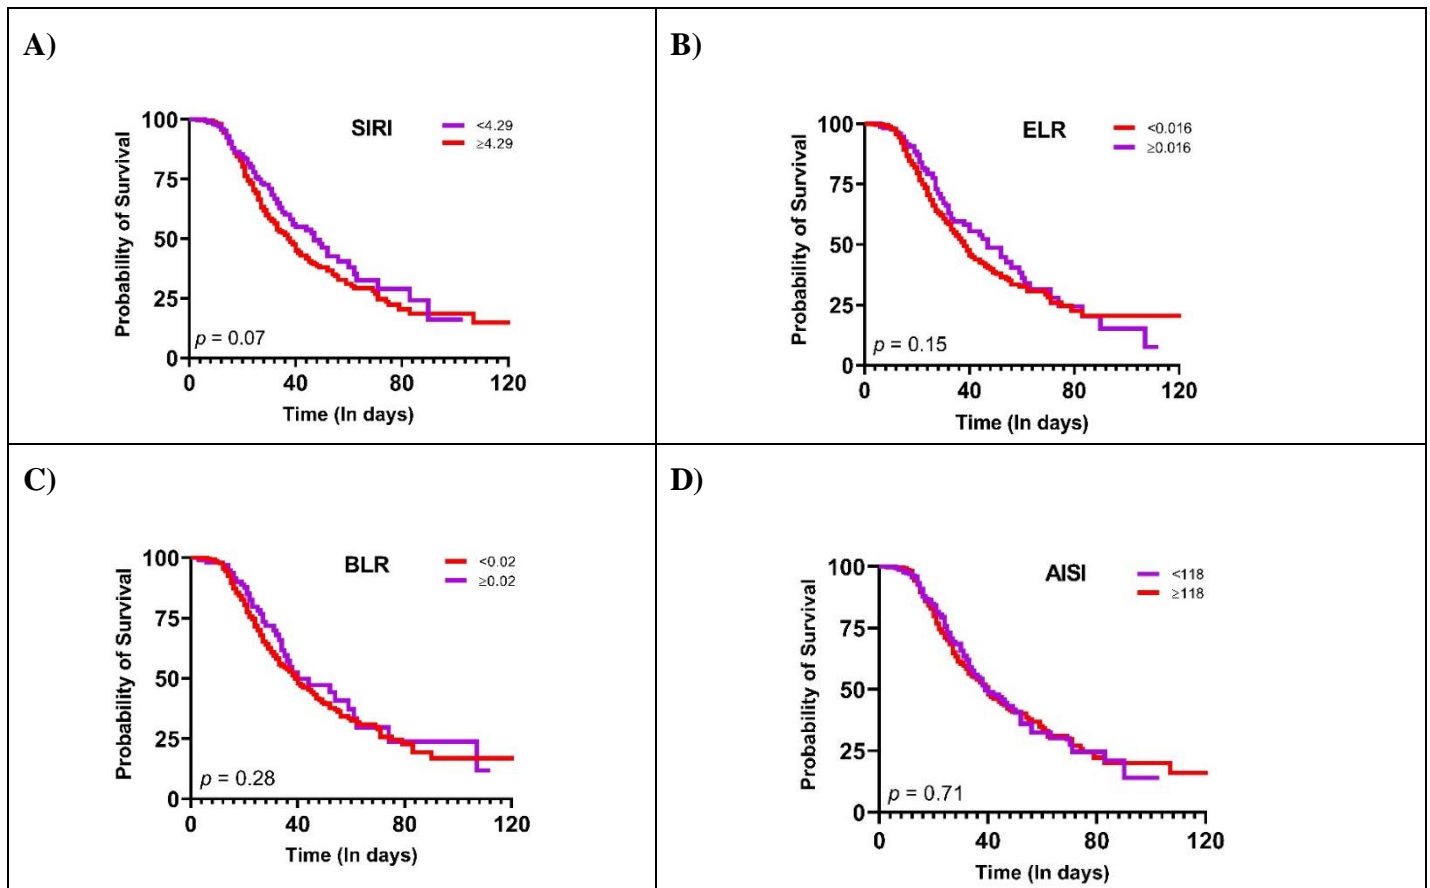

**Supplementary Figure 2 | Kaplan–Meier survival curves during hospitalization of COVID-19 in Mexican patients with different cut-off values of the systemic inflammation indices not significantly related.** (A) SIRI, (B) ELR, (C) BLR, (D) AISI. Statistical analyses were performed by the Kaplan-Meier method and compared using the Log-rank test. Significance was set at  $p$ -value  $<0.05$ .
